# Supplementary material
Source: PubMed Central journal article supplement (PMC5621880)
Supplement: jciinsight-2-93684-s001.pdf [file jciinsight-2-93684-s001.pdf]

# 1 Supplemental Materials:

## 2 Supplemental Table 1: Subject characteristics

| Donor Identifier | HAART | Plasma VL        | CD4 Count     | Duration on HAART (years) |
|------------------|-------|------------------|---------------|---------------------------|
| OM2              | Yes   | 49               | 410           | 9.0                       |
| OM4              | No    | 49               | 600           |                           |
| OM9              | No    | 88               | 550           |                           |
| OM25             | No    | 1024             | 250           |                           |
| OM32             | Yes   | 16000            | 953           | 1.8                       |
| OM33             | Yes   | 49               | 350           | 0.7                       |
| OM35             | No    | 1566             | 300           |                           |
| OM44             | No    | 8459             | 710           |                           |
| OM99             | Yes   | 49               | 450           | 4.0                       |
| OM101            | No    | 82693            | 340           |                           |
| OM214            | No    | 38600            | 310           |                           |
| OM265            | Yes   | 49               | 540           | 9.0                       |
| OM275            | Yes   | 49               | 840           | 9.0                       |
| OM288            | Yes   | 49               | 690           | 9.0                       |
| OM292            | Yes   | 49               | 600           | 9.0                       |
| OM298            | Yes   | 49               | 830           | 5.0                       |
| OM357            | No    | 1582             | 610           |                           |
| OM359            | Yes   | 49               | 830           | 1.3                       |
| OM363            | Yes   | 204              | 740           | 1.1                       |
| OM442            | Yes   | 49               | 430           | 0.6                       |
| OM522            | Yes   | 49               | 450           | 0.6                       |
| OM680            | No    | 996              | 670           |                           |
| OM727            | No    | 149256           | 621           |                           |
| OM5028           | No    | 91               | 820           |                           |
| OM5039           | No    | 2420             | 460           |                           |
| OM5218           | Yes   | 49               | 470           | 0.7                       |
| OM5220           | Yes   | 49               | 650           | 2.0                       |
| OM5223           | No    | 28955            | 610           |                           |
| OM5245           | Yes   | 49               | 780           | 1.0                       |
| OM5265           | Yes   | 49               | 870           | 0.5                       |
| OM5267           | Yes   | 94617            | 290           | 0.5                       |
| OM5314           | No    | 55               | 1070          |                           |
| OM5318           | Yes   | 49               | 570           | 2.0                       |
| OM5327           | Yes   | 49               | 810           | 2.0                       |
| OM5328           | No    | 95554            | 490           |                           |
| OM8010           | No    | 1786             | 703           |                           |
| OM8011           | No    | 49               | 1267          |                           |
| OM8017           | No    | 14000            | 272           |                           |
| OM8020           | No    | 1318             | 1010          |                           |
| OM8026           | No    | 453              | 580           |                           |
| OM8027           | No    | 46000            | 598           |                           |
| Median (IQR)     | No    | 1582 (272-33778) | 600 (400-600) | -                         |
| Median (IQR)     | Yes   | 49 (49-49)       | 625 (450-825) | 1.9 (0.7-8.0)             |
| Median (IQR)     | -     | 88 (49-5440)     | 600 (450-795) | 1.9 (0.7-8.0)             |

4 **Supplemental Figure Legends:**  
Supplemental Figure 1

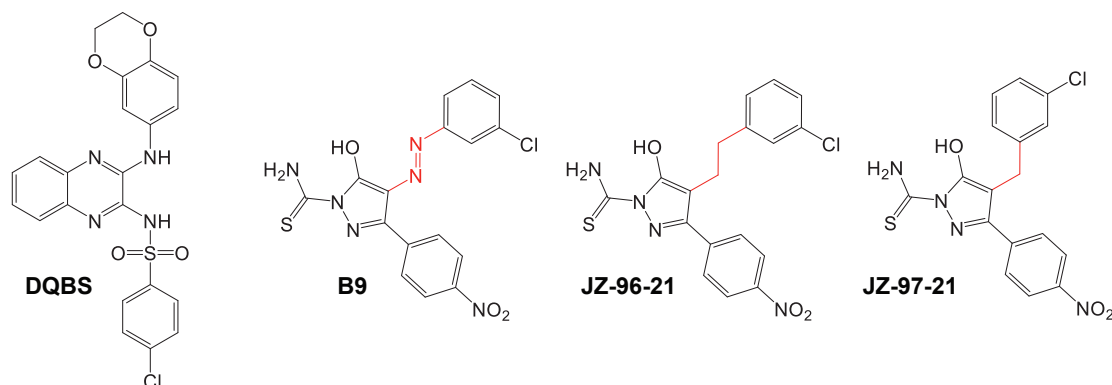

| Compound | Chemical class          | MW    | Nef binding<br>( $K_D$ , nM) <sup>a</sup> | Infectivity<br>$IC_{50}$ , $\mu M$ <sup>b</sup> | Cytotoxicity<br>$CC_{50}$ , $\mu M$ <sup>b</sup> | Replication<br>% inhibition <sup>c</sup> | Reference<br>(PMID)                                  |
|----------|-------------------------|-------|-------------------------------------------|-------------------------------------------------|--------------------------------------------------|------------------------------------------|------------------------------------------------------|
| DQBS     | Diamino-<br>quinoxaline | 468.9 | N/D                                       | >3.0                                            | >3.0                                             | 52.2%                                    | <i>Retrovirology</i> , 2013<br>(24229420)            |
| B9       | Diphenyl-<br>pyrazole   | 402.8 | 82                                        | 2.53                                            | 10                                               | 54.6%                                    | <i>Bioorg Med Chem<br/>Lett</i> , 2016<br>(26852364) |
| JZ-96-21 |                         | 402.9 | 159                                       | 0.69                                            | >10                                              | 64.5%                                    |                                                      |
| JZ-97-21 |                         | 388.8 | 150                                       | 3.54                                            | >10                                              | 51.6%                                    |                                                      |

<sup>a</sup> Binding constants determined *in vitro* by surface plasmon resonance with recombinant Nef; N/D, not determined by SPR. Direct interaction of DQBS with recombinant Nef has been demonstrated by differential scanning fluorimetry.

<sup>b</sup> Inhibition of Nef-dependent infectivity enhancement and cytotoxicity determined in TZM/bl reporter cells infected with HIV-1 NL4-3.

<sup>c</sup> Inhibition of Nef-dependent HIV-1 NL4-3 replication determined in U87MG/CD4/CXCR4 cells. Each compound tested at 3.0  $\mu M$ ; no cytotoxicity observed at this concentration.

**Supplemental Figure 1. Chemical structures of the Nef inhibitors used in the study.** Structures of each of the small molecule inhibitors of Nef are shown at the top. The compounds JZ-96-21 and JZ-97-21 are B9 analogs in which the diazene linked (red) has been substituted with a one or two carbon bridge. The table summarizes important features of each compound, including *in vitro* binding data and effects on Nef-dependent enhancement of HIV-1 infectivity and replication in cell lines. Additional details can be found in the citations.

Supplemental Figure 2

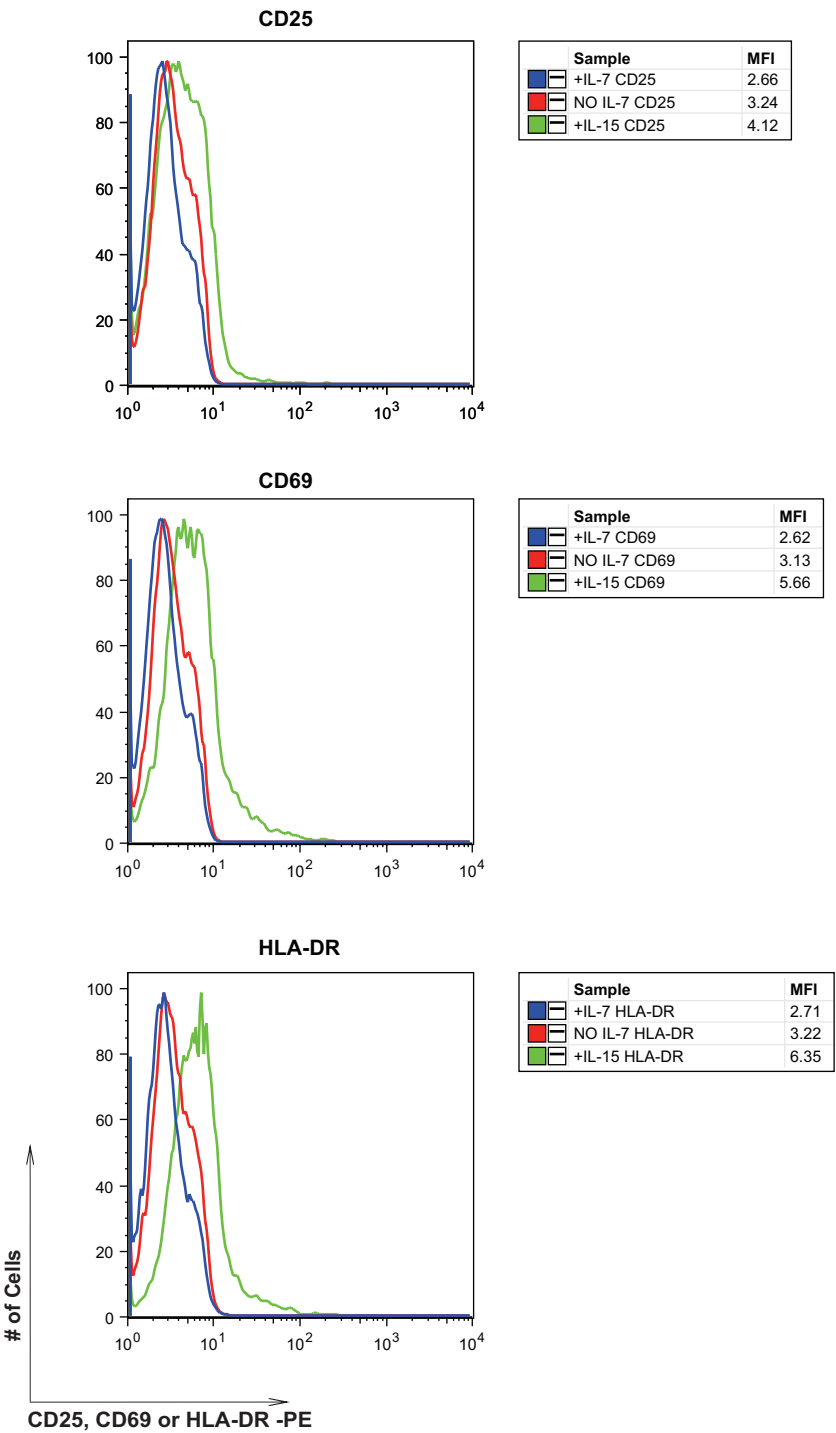

**Supplemental Figure 2. Low dose of IL-7 does not induce activation of in vitro generated latently HIV-1 infected cells.** Primary resting CD4 T cells were generated as described in the *Methods* section. IL-7 (1 ng/mL) was added to the CD4 T cell cultures for survival in each experiment. At this dose, IL-7 did not induce upregulation of the activation markers CD25, CD69 or HLA-DR. Shown are the histograms comparing expression of each marker on the surface of resting CD4 T cells with IL-7 (blue line) compared to similar cells cultured without IL-7 (red line) for 7 days. IL-15 stimulated cells (green line) are also included as a positive control and exhibit elevated expression of each of the activation markers probed.

Supplemental Figure 3

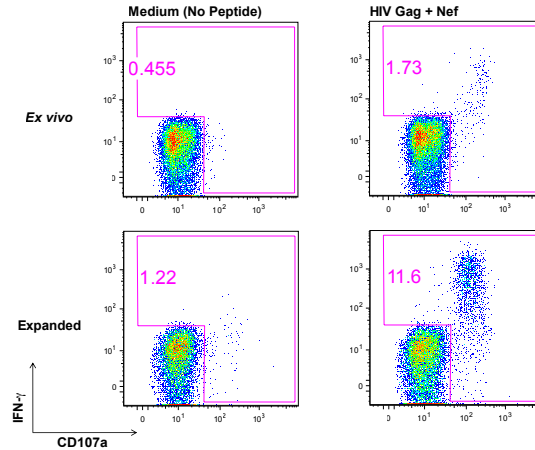

**Supplemental Figure 3. HIV-1 Gag and Nef peptide stimulation expands antigen specific CD8 T cells.**

PBMC from an HIV-1 infected donor on suppressive HAART (plasma viral load undetectable) were stimulated with HIV-1 Gag (80 ng/mL/peptide) and Nef (200 ng/mL/peptide) peptide pools as described in the *Methods*. Six days later cells were re-stimulated with 1 $\mu$ g/mL/peptide of Gag and Nef peptide pools for six hours in the presence of Brefeldin A and an antibody against CD107a. Intracellular staining for IFN- $\gamma$  was performed and cells were analyzed via flow cytometry. Numbers inset represent the frequency of CD8 T cells degranulating (CD107a<sup>+</sup>) and producing cytokines in response to peptide stimulation. For comparison, the ex vivo frequencies of HIV-1 Gag and Nef specific cells are shown (top row). HIV-1 peptide stimulation over 6 days resulted in a robust expansion of antigen specific CD8 T cells compared to ex vivo frequencies.

Supplemental Figure 4

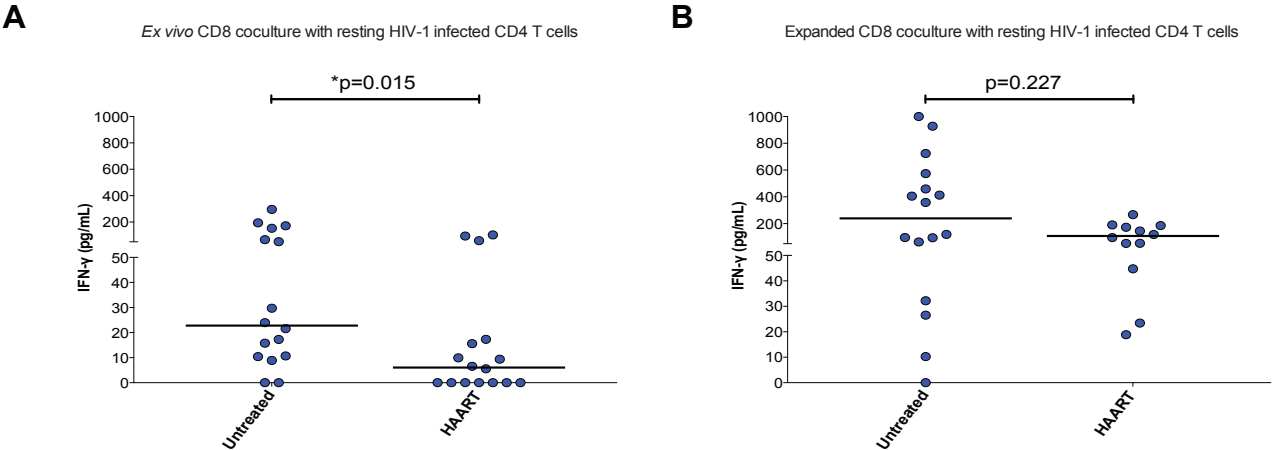

**Supplemental Figure 4. Detectable responses from cocultures with autologous isolated ex vivo CD8 T cells are dependent on treatment status and can be restored by HIV-peptide expansion.** Data from the IFN- $\gamma$  coculture experiments reported in the manuscript were split based on donors' antiretroviral treatment statuses i.e. on HAART therapy or not ('Untreated'). Reported data were generated from cocultures of autologous CD8 T cells with wild-type HIV-1 latently infected CD4 T cells. Shown in **(A)** and **(B)** are the IFN- $\gamma$  levels detected following overnight coculture with freshly isolated ex vivo or HIV-peptide stimulated 'expanded' CD8 T cells, respectively. Mann-Whitney U tests were performed for each analyses between the 'Untreated' and the HAART subsets within each group. Ex vivo CD8 cocultures indicated a greater detectable response from the 'Untreated' fraction compared to the 'HAART' treated group due to a greater frequency of HIV-specific CD8 T cells. Cocultures with HIV-peptide expanded CD8 T cells negated this difference.

## Supplemental Figure 5

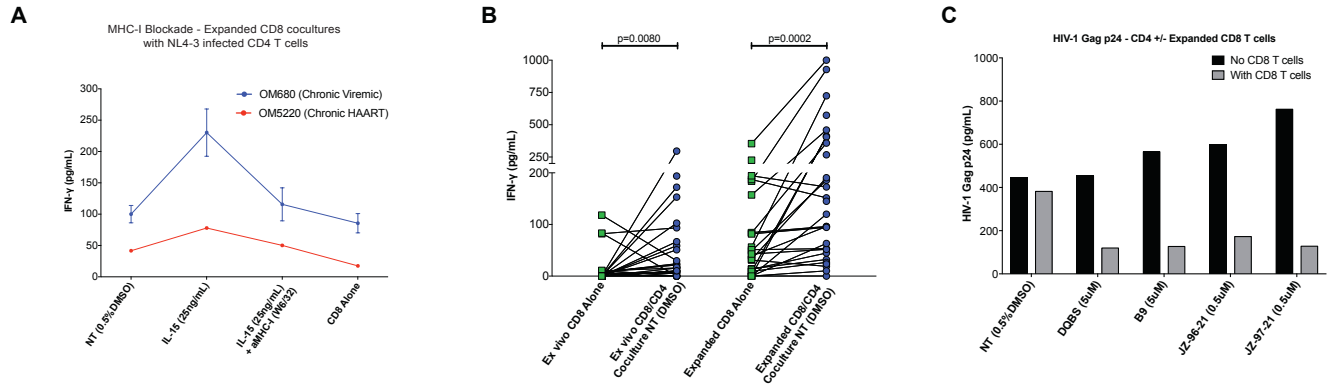

**Supplemental Figure 5. Detected immune response detected are dependent upon CD8 CTL-mediated recognition of autologous HIV-1 infected CD4 T cell targets. (A)** Autologous HIV-peptide expanded CD8 T cells were cocultured with HIV-1 NL4-3 latently infected cells, generated as described in the *Methods* that had been stimulated with IL-15 for 6 days. CD8 T cell cocultures were performed in the presence or absence of the MHC-I blocking antibody, W6/32 (10  $\mu$ g/mL). IFN- $\gamma$  was quantitated in the supernatant following overnight coculture as described in the *Methods*. Each individual experiment is depicted by coloured lines: blue lines illustrate cocultures between a chronically infected therapy naïve donor's T cells, OM680; red lines indicate cocultures with T cells from OM5220, a chronically infected donor on suppressive HAART. Cocultures of IL-15 stimulated CD4 T cells yielded maximal production of IFN- $\gamma$  from autologous CD8 T cells as these produce maximal viral antigens (Figure 2A in the manuscript). Recognition of IL-15 stimulated NL4-3 infected CD4 T cells was completely abrogated in the presence of the MHC-I blocking antibody as indicated by the IFN- $\gamma$  levels diminishing to basal levels in the cultures with the W6/32 antibody indicating that CD8 CTL recognition of antigens presented on MHC-I induced IFN- $\gamma$  production by CTL. **(B)** In several experiments of the IFN- $\gamma$  release assay (n=24 with each, ex vivo and expanded CD8 T cells; n=48 total) we cultured purified CD8 T cells alone at equivalent cell numbers as in the CD4:CD8 cocultures and measured IFN- $\gamma$  following overnight incubation in the supernatants in parallel with cocultures. In these CD8 T cell alone wells we detected minimal IFN- $\gamma$  due to the absence of antigen. However, coincubation of these CD8 T cells with resting latently infected autologous CD4 T cell targets resulted in basal IFN- $\gamma$  production in response to antigen which was statistically significant (Wilcoxon matched pairs test performed between groups). **(C)** HIV-1 Gag p24 was quantitated by ELISA in an individual following viral outgrowth in cultures of latently HIV-1 infected CD4 T cells with or without expanded CD8 T cells. The addition of CD8 CTL to cultures induced the elimination of latently HIV-1 infected CD4 T cells compared to paired cultures without CD8 T cells that did not exhibit any reduction in p24 levels from DMSO control. Furthermore, coincubation of CD8 T cells with Nef inhibitor treated CD4 T cells exhibit enhanced clearance relative to the DMSO control. Collectively, these results demonstrate that IFN- $\gamma$  detected in our assays is CTL-dependent and due to recognition of antigen via MHC-I presentation from HIV-1 infected CD4 T cells.

Supplemental Figure 6

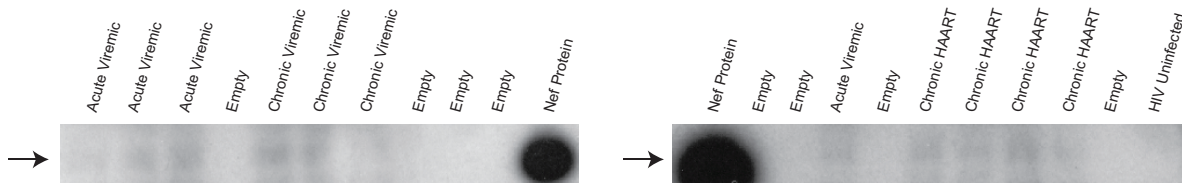

**Supplemental Figure 6. Nef protein is detectable in PBMC of HIV-1 infected donors on or off HAART therapy.** CD8 T cell-depleted PBMC ( $5 \times 10^6$ ) from various HIV-1 infected and uninfected donors were lysed with RIPA buffer and protease inhibitor and lysates were cleared by centrifugation. Nef protein was immunoprecipitated (IP) via Protein A complexes utilizing a rabbit polyclonal Nef antiserum. IP samples were run on a denaturing SDS PAGE gel along with lane of recombinant purified Nef protein and transferred onto a PVDF membrane. PVDF blots were probed with mouse anti-HIV-1 Nef monoclonal antibodies EH1 and JR-CSF and developed on X-ray film. Two separate experiments are shown with their respective positive control band (recombinant purified Nef protein); a two-hour exposure is shown. The arrow indicates bands corresponding to the HIV-1 Nef protein.

## Supplemental Figure 7

|                  |    | 104         | 107  | 126                                     |
|------------------|----|-------------|------|-----------------------------------------|
| CON_OF_CONS      | 93 | EKGGLDGLIYS | KKRQ | EILDLWVYHTQGYFPDWQNYTPGPGIRYPLTFGWC 142 |
| Mgroup.anc       |    | EKGGLDGLIYS | KKRQ | EILDLWVYHTQGYFPDWQNYTPGPGIRYPLTFGWC     |
| CONSENSUS_A      |    | EKGGLDGLIYS | KKRQ | EILDLWVYHTQGYFPDWQNYTPGPGIRYPLTFGWC     |
| CONSENSUS_A1     |    | EKGGLDGLIYS | KKRQ | EILDLWVYHTQGYFPDWQNYTPGPGIRYPLTFGWC     |
| A1.anc           |    | EKGGLDGLIYS | KKRQ | EILDLWVYHTQGYFPDWQNYTPGPGIRYPLTFGWC     |
| CONSENSUS_A2     |    | EKGGLDGLIYS | KKRQ | EILDLWVYHTQGYFPDWQNYTPGPGIRYPLTFGWC     |
| CONSENSUS_B      |    | EKGGLDGLIYS | KKRQ | EILDLWVYHTQGYFPDWQNYTPGPGIRYPLTFGWC     |
| B.anc            |    | EKGGLDGLIYS | KKRQ | EILDLWVYHTQGYFPDWQNYTPGPGIRYPLTFGWC     |
| CONSENSUS_02_AG  |    | EKGGLDGLIYS | KKRQ | EILDLWVYHTQGYFPDWQNYTPGPGIRYPLTFGWC     |
| CONSENSUS_C      |    | EKGGLDGLIYS | KKRQ | EILDLWVYHTQGYFPDWQNYTPGPGIRYPLTFGWC     |
| C.anc            |    | EKGGLDGLIYS | KKRQ | EILDLWVYHTQGYFPDWQNYTPGPGIRYPLTFGWC     |
| CONSENSUS_D      |    | EKGGLDGLIYS | KKRQ | EILDLWVYHTQGYFPDWQNYTPGPGIRYPLTFGWC     |
| CONSENSUS_F1     |    | EKGGLDGLIYS | KKRQ | EILDLWVYHTQGYFPDWQNYTPGPGIRYPLTFGWC     |
| CONSENSUS_F2     |    | EKGGLDGLIYS | KKRQ | EILDLWVYHTQGYFPDWQNYTPGPGIRYPLTFGWC     |
| CONSENSUS_G      |    | EKGGLDGLIYS | KKRQ | EILDLWVYHTQGYFPDWQNYTPGPGIRYPLTFGWC     |
| CONSENSUS_H      |    | EKGGLDGLIYS | KKRQ | EILDLWVYHTQGYFPDWQNYTPGPGIRYPLTFGWC     |
| CONSENSUS_01_AE  |    | EKGGLDGLIYS | KKRQ | EILDLWVYHTQGYFPDWQNYTPGPGIRYPLTFGWC     |
| CONSENSUS_03_AB  |    | EKGGLDGLIYS | KKRQ | EILDLWVYHTQGYFPDWQNYTPGPGIRYPLTFGWC     |
| CONSENSUS_04_CPX |    | EKGGLDGLIYS | KKRQ | EILDLWVYHTQGYFPDWQNYTPGPGIRYPLTFGWC     |
| CONSENSUS_06_CPX |    | EKGGLDGLIYS | KKRQ | EILDLWVYHTQGYFPDWQNYTPGPGIRYPLTFGWC     |
| CONSENSUS_08_BC  |    | EKGGLDGLIYS | KKRQ | EILDLWVYHTQGYFPDWQNYTPGPGIRYPLTFGWC     |
| CONSENSUS_10_CD  |    | EKGGLDGLIYS | KKRQ | EILDLWVYHTQGYFPDWQNYTPGPGIRYPLTFGWC     |
| CONSENSUS_11_CPX |    | EKGGLDGLIYS | KKRQ | EILDLWVYHTQGYFPDWQNYTPGPGIRYPLTFGWC     |
| CONSENSUS_12_BF  |    | EKGGLDGLIYS | KKRQ | EILDLWVYHTQGYFPDWQNYTPGPGIRYPLTFGWC     |
| CONSENSUS_14_BG  |    | EKGGLDGLIYS | KKRQ | EILDLWVYHTQGYFPDWQNYTPGPGIRYPLTFGWC     |

**Supplemental Figure 7. Critical residue N126 for inhibitor binding is conserved across multiple consensus HIV-1 Nef sequences.** Docking models with the four inhibitors and a crystal structure of the Nef dimer (PDB:1EFN) have identified Nef residues Q104, Q107 and N126 (HXB2 numbering; GenBank K03455) as possible inhibitor contacts within the Nef structures (references [25-27] in main text). Of these, N126 (highlighted yellow) has been validated as a point of inhibitor contact by mutagenesis and conserved across multiple global clades of HIV-1 as shown. The residues Q104 and Q107 (highlighted green) may help stabilize the protein:inhibitor complex. Consensus sequence data was obtained from the Los Alamos HIV Database (<http://www.hiv.lanl.gov/>). The most recently updated sequence database (2014) available at the time of writing this manuscript is displayed.

93 **Supplemental Materials and Methods:**

94 *HIV-1 Nef western blot*

95 Frozen PBMC from HIV-1 infected and uninfected donors were thawed at 37°C, washed and  
96 counted. CD8 T cells were depleted from PBMC using StemCell CD8 Positive Selection kit as  
97 per manufacturer's protocol. 5x10<sup>6</sup> CD8 depleted PBMC were lysed in 100μL of 1X RIPA  
98 buffer (Cell Signalling) containing 1X Protease Inhibitor, EDTA free (Roche) for 15 minutes at  
99 4°C with rocking. Lysates were cleared by centrifugation at 21,000xg for 30minutes and  
100 supernatant was collected. Nef protein was immunoprecipitated from the lysates using  
101 Dynabeads Protein A kit (Life Technologies) with a rabbit polyclonal serum against HIV-1 Nef  
102 (Catalog #2949, NIH AIDS Reagent Program). Immunoprecipitated samples were loaded on a  
103 12% Bis-Tris SDS PAGE gel (Life Technologies) and transferred onto a PVDF membrane.  
104 Blocking was performed with a 3% BSA solution in 1X PBS. Anti HIV-1 Nef mouse antibodies  
105 EH1 and JR-CSF (Catalog #3689 and 1539 respectively, NIH AIDS Reagent Program) were  
106 used at 0.25μg/mL each in a 1% BSA solution in TBS-Tween20 to probe for Nef and a goat  
107 anti-mouse HRP antibody (Life Technologies) served as the secondary antibody. ECL Plus  
108 (Thermo Fisher) chemiluminescent substrate was used to develop and image the blot on X-  
109 Ray film.
